16 **Abstract**

17

18 Modern Japanese are considered to derive from a mixture of two major ancestral  
19 populations: the indigenous Jomon people and immigrants from continental East  
20 Asia. Since most of the existing methods for detecting genetic components from  
21 ancestral populations require their genomes, ancestral genomic components in  
22 Japanese could not be detected so far due to the lack of precisely sequenced  
23 ancient Jomon genomes. To overcome the difficulty, we developed a reference-  
24 free detection method using a novel summary statistic, the ancestry-marker index  
25 (*AMI*). We applied the *AMI* to modern Japanese samples from the 1000 Genomes  
26 Project and identified 208,648 ancestry-marker SNPs that were likely derived  
27 from the Jomon people (Jomon-derived SNPs). Comparing the Jomon allele  
28 score detected in this study with modern Japanese and two ancient Jomon  
29 individuals showed that the Jomon derived SNPs were detected with high  
30 accuracy by the *AMI* in real data, and that the Jomon derived SNPs were detected  
31 by several tens of times from a single Jomon individual by the *AMI*. The analysis  
32 of Jomon-derived SNPs in 10,842 modern Japanese individuals recruited from  
33 all the 47 prefectures of Japan showed that the genetic differences among the  
34 prefectures were mainly caused by differences in the admixture proportion of the  
35 Jomon people, due to the difference of population size of immigrants in the final  
36 Jomon to the Yayoi period. We also confirmed the presence of the Jomon alleles  
37 around phenotype associated SNPs characteristic of East Asians to clarify  
38 whether these phenotypes of modern Japanese were derived from the Jomon  
39 people.

## 40 Introduction

41

42 Modern Japanese populations are divided into three main populations: the  
43 Ainu, who live mainly in Hokkaido; the Ryukyuan, who live mainly in Okinawa;  
44 and mainland Japanese, who live in Honshu, Shikoku, and Kyushu (Fig. 1). As a  
45 powerful hypothesis of the formation processes of Japanese populations, a dual  
46 structure model(Hanihara 1991) was proposed based on morphology. This model  
47 assumes that Japanese originated through a mixture of the Jomon people, who  
48 settled in the Japanese archipelago during the Jomon period (from 16,500 YBP  
49 to 2,800 YBP)(Habu 2004; Mizoguchi 2013; Fujio 2015), and the immigrants  
50 came to the Japanese archipelago from continental East Asia around the  
51 beginning of the Yayoi period (around 2,800 YBP)(Fujio 2015). According to this  
52 model, compared to mainland Japanese, the Ainu and the Ryukyuan were  
53 genetically less influenced by immigrants. Findings from genetical studies  
54 support the dual structure model(Jinam et al. 2012; Jinam et al. 2015; Nakagome  
55 et al. 2015; Kanzawa-Kiriyama et al. 2017; Kanzawa-Kiriyama et al. 2019).  
56 Whole-genome analyses extracted from the remains of the Jomon people have  
57 revealed that the Jomon were highly differentiated from other East Asians, being  
58 genetically closely related to the Ainu/Ryukyuan, and that 10–20% of genomic  
59 components found in mainland Japanese are derived from the Jomon  
60 people(Kanzawa-Kiriyama et al. 2017; Kanzawa-Kiriyama et al. 2019). However,  
61 it is still unknown whether there are regional differences in the admixture degree  
62 between the Jomon people and immigrants in mainland Japanese and how they  
63 admixed in the Japanese Archipelago. To solve these problems, it is necessary

64 to comprehensively detect genomic components or single nucleotide  
65 polymorphisms (SNPs) in mainland Japanese that were derived from Jomon  
66 people and analyze them in detail at the prefectural level.

67

68 In populations derived from a mixture of two source populations,  
69 recombination between haplotypes from different source populations inevitably  
70 occurs after the admixture event. As a result, haplotypes from two ancestral  
71 populations are patchily present in the chromosomes of admixed populations,  
72 and the alleles in the haplotypes from each ancestral population are in linkage  
73 disequilibrium (LD) with each other (Supplementary Fig. 1). Most existing  
74 methods(Price et al. 2009; Baran et al. 2012; Churchhouse and Marchini 2013;  
75 Guan 2014; Hui et al. 2017) for estimating the local ancestry of genomes using  
76 the LD state require genome information of ancestral populations or of modern  
77 populations as proxies of ancestral populations. In the Japanese population, only  
78 a few Jomon individuals(Kanzawa-Kiriyama et al. 2017; Mccoll et al. 2018;  
79 Kanzawa-Kiriyama et al. 2019; Gakuhari et al. 2020) have been sequenced so  
80 far. Furthermore, the sequence depths of these samples are low, except for the  
81 Funadomari Jomon(Kanzawa-Kiriyama et al. 2019) people excavated from  
82 Rebun Island in Hokkaido, making it difficult to obtain sufficient genome  
83 information to accurately estimate the local ancestry of modern Japanese (i.e.,  
84 the genomes of many Jomon individuals are required to perform highly accurate  
85 studies). Therefore, at present, it is not possible to estimate the local ancestry of  
86 modern mainland Japanese using previous methods. In this study, we developed  
87 a method using a new summary statistic, the Ancestry-Marker Index (*AMI*), to

88 detect ancestry-marker SNPs derived from the Jomon people in modern  
89 mainland Japanese that does not require genomes obtained from Jomon skeletal  
90 specimens. Since the Jomon people have been found to be highly differentiated  
91 from other East Asians(Kanzawa-Kiriyama et al. 2017; Kanzawa-Kiriyama et al.  
92 2019), they are expected to have had specific variants that were not found in  
93 other East Asians. Thus, the modern mainland Japanese also likely have specific  
94 variants derived from the Jomon people. The *AMI* detects the Jomon-derived  
95 variants based on the LD between Japanese specific variants. Based on the *AMI*,  
96 we could successfully extract the Jomon-derived variants from real genomic data  
97 of the Japanese. Using Jomon-derived variants, we clarified regional differences  
98 among modern Japanese and estimated the population frequencies of alleles  
99 associated with common phenotypes, which are characteristic of East Asians, in  
100 the Jomon people. Based on these results, we propose a model of admixture  
101 between the Jomon people and immigrants from continental East Asia in the  
102 Japanese Archipelago.

103

## 104 **Results**

105

### 106 **Performance of *AMI***

107

108 To confirm the usefulness of the *AMI*, we performed a coalescent  
109 simulation assuming a mixture of the Jomon people and continental East Asians  
110 (Supplementary Fig. 2). The preliminary 10 Mb simulation suggested that modern

111 Japanese still have haplotypes of several megabases that are derived from the  
112 Jomon people (see Supplementary Fig. 3 and Supplementary Texts).

113

114 There are three types of Japanese specific variants: (type 1) Jomon-  
115 derived variants; (type 2) variants derived from continental East Asians; and (type  
116 3) novel variants (see Supplementary Fig. 4 and Methods). Our aim is to  
117 distinguish Jomon-derived variants (type 1) from (type 2) and (type 3). In the  
118 subsequent 1 Mb simulation, Japanese specific variants (types 1, 2, and 3) were  
119 extracted from each genealogy. The distributions of *AMI* for Jomon-derived  
120 variants (type 1) and other variant types (types 2 and 3) are shown in Fig. 2 (a).  
121 It was found that Jomon-derived variants (type 1) had larger *AMI* values than the  
122 other Japanese specific variants (types 2 and 3). The receiver operating  
123 characteristic (ROC) analysis showed that Jomon-derived variants (type 1) could  
124 be distinguished from the other Japanese specific variants (types 2 and 3) by the  
125 *AMI* (area under the curve [AUC] = 0.91; Fig. 2 (b)). The Youden index, a  
126 measure of the cutoff value, was 28.0374. We performed further simulations,  
127 varying the split time between the Jomon people and continental East Asians or  
128 the effective population size in simulation, to confirm robustness of *AMI* to  
129 different population history. Though the value of the Youden index varied  
130 depending on the population history assumed, the Jomon-derived variants could  
131 be accurately detected (Supplementary Fig. 5). According to Fig. 2, we set the  
132 threshold for detecting Jomon-derived variants at  $AMI > 28.0374$ .

133

134 We also attempted to detect Jomon SNPs by  $S^*$ (Plagnol and Wall 2006;  
135 Vernot and Akey 2014), a reference-free method previously proposed, and found  
136 that  $S^*$  was unable to detect Jomon SNPs, perhaps due to an insufficient number  
137 of Jomon-derived specific variants of mainland Japanese (Supplementary Fig. 6  
138 and Supplementary Texts).

139

#### 140 **Detection of Jomon variants in real data**

141

142 Using the data set of 87 KPGP Koreans(Zhang et al. 2014) and 26 global  
143 populations of 1KG(Auton et al. 2015), approximately 1.7 million SNPs were  
144 found to be specific to mainland Japanese (1KG JPT). Of these 1.7 million SNPs,  
145 208,648 SNPs exceeding the threshold of  $AMI$  were regarded as Jomon-derived  
146 SNPs. Jomon-derived SNPs were distributed throughout the autosomal genome  
147 (Supplementary Fig. 7). Hereafter, at the Jomon-derived SNPs, an allele only  
148 found in the mainland Japanese population is called a “Jomon allele.”

149

150 To examine the detection accuracy of Jomon-derived SNPs, we calculated  
151 the Jomon allele score ( $JAS$ , see Methods section for details) for the  
152 Ikawazu(Mccoll et al. 2018; Gakuhari et al. 2020)/Funadomari(Kanzawa-  
153 Kiriya et al. 2019) Jomon individuals and mainland Japanese. If Jomon-  
154 derived SNPs were properly detected by the  $AMI$ , the  $JAS$  of the Ikawazu or  
155 Funadomari Jomon were expected to be higher than those of mainland Japanese.  
156 Of the JPT mainland Japanese, NA18976 was genetically close to continental  
157 East Asians in PCA (Supplementary Fig. 8) and was expected to have a lower

158 *JAS*. The distribution of the *JAS* is shown in Supplementary Fig. 9. The mean  
159 *JAS* of 103 mainland Japanese individuals, excluding NA18976, was 0.0164. As  
160 expected, NA18976 had the lowest *JAS*, 0.00269, which was much lower than  
161 that of the other mainland Japanese. The *JAS* in the Ikawazu/Funadomari Jomon  
162 were 0.0523 and 0.0555, respectively, indicating that the Jomon alleles were  
163 found more frequently in Jomon people than in the modern mainland Japanese.  
164 These results suggest that the *AMI* could detect SNPs derived from the Jomon  
165 people. In addition, the *JAS* values were only a few % for both Jomon individuals,  
166 which suggests that the number of Jomon-specific variants obtained from *AMI*  
167 analyses of modern Japanese were several tens of times greater than that  
168 obtained from the whole genome sequence of a single Jomon individual.

169

## 170 **Detection of regional genetic differences in mainland Japanese by Jomon-** 171 **derived SNPs**

172

### 173 ***JAS* by region and prefecture**

174 Previous prefecture-scale population studies showed that the Tohoku, Kanto,  
175 and Kyushu populations (Fig. 1) are genetically more closely related to the  
176 Ryukyans, while the Kinki and Shikoku populations are more closely related to  
177 continental East Asians (Yamaguchi-Kabata et al. 2008; Watanabe et al. 2020).  
178 Based on these facts, we hypothesized that the genetic regional differences  
179 among the modern mainland Japanese are caused by regional geographical  
180 differences in the admixture proportion of the Jomon and immigrants from  
181 continental East Asia. To verify this, we calculated the average *JAS* for each



182 geographic region and prefecture from imputed genotypes of 3,917 Jomon-  
183 derived SNPs of 10,842 Japanese individuals previously used for regional  
184 population genetic analysis(Watanabe et al. 2020). We removed the Hokkaido  
185 samples, which were largely affected by the immigration of Japanese after the  
186 Meiji period, for subsequent analysis and a total of 10,412 samples were used.  
187 The samples of each prefecture except for Hokkaido were divided into ten  
188 regions: Tohoku, Kanto, Hokuriku, Chubu, Tokai, Kinki, Chugoku, Shikoku,  
189 Kyushu, and Okinawa in accordance with a previous study(Koyama 1979) (Fig.  
190 1 and Supplementary Table 1). The *JASs* in these ten geographical regions are  
191 presented in Fig. 3 (a) and Supplementary Table 2. We found that the *JAS* was  
192 the highest in Okinawa (0.0255), followed by Tohoku (0.0189) and Kanto (0.018),  
193 and the lowest in Kinki (0.0163), followed by Shikoku (0.016). In prefecture scale,  
194 the average *JAS* in mainland Japan tended to be higher in prefectures located in  
195 the northernmost and southernmost parts of mainland Japan (Fig. 3 (b) and  
196 Supplementary Table 3). The *JAS* was especially high in Aomori (0.0192), Iwate  
197 (0.0195), Fukushima (0.0187), and Akita (0.0186) prefectures of the Tohoku  
198 region, as well as Kagoshima Prefecture (0.0186) in Kyushu. Japanese  
199 individuals in these prefectures are considered to possess more Jomon-derived  
200 genomic components than those in other prefectures. Prefectures with lower  
201 *JASs* were in the Kinki and Shikoku regions, including Wakayama (0.0157), Nara  
202 (0.0189), Kochi (0.016), Tokushima (0.0161), and Mie (0.0161). These  
203 populations are considered to have more genomic components derived from  
204 continental East Asians. The *JAS* of each prefecture and the principal component  
205 1 (PC1) value, which was obtained from the principal component analysis (PCA)

206 of a previous study by the allele frequency of autosomal 183,708 SNPs in each  
207 prefecture(Watanabe et al. 2020) are plotted in Fig. 3 (c). The *JAS* was strongly  
208 correlated with PC1 ( $R = 0.91$ , two-sided  $t$ -test  $P = 2.2 \times 10^{-16}$ ). The geographic  
209 distribution was not changed by tighter cutoff values ( $AMI > 100$ ) for the detection  
210 of Jomon-derived SNPs by *AMI* (Supplementary Figure 10 and Supplementary  
211 Texts).

212

213 To confirm the results obtained from *JAS*,  $f_3$ (each prefecture; Jomon,  
214 CHB)(Patterson et al. 2012) were also calculated (Supplementary Fig. 11). The  
215 distribution of  $f_3$ , shown in Supplementary Fig. 11 (a) and (b) is similar to the  
216 distribution of the *JAS*s (Fig. 3 (b)), with  $f_3$  being generally small in prefectures  
217 with high *JAS*s, such as Kagoshima Prefecture in Kyushu and Aomori and Iwate  
218 Prefectures in Tohoku, and was large in the prefectures of regions with low *JAS*s,  
219 such as Kinki and Shikoku. Based on these two findings: a correlation between  
220 the *JAS* and the PC1 of Fig. 3 (c) and the concordance between the geographical  
221 distribution of  $f_3$  and *JAS*, it is strongly suggested that the genetic regional  
222 differences of modern Japanese can be explained mainly by regional  
223 geographical differences in the admixture proportions of the Jomon people. It  
224 should be emphasized that the admixture, although to varying degrees, widely  
225 occurred throughout the Japanese archipelago. Notably, prefectures in the  
226 Tohoku region showed higher *JAS*s than those in the Kyushu region. However,  
227  $f_3$  values were lower in Kyushu than in Tohoku. Since the Jomon-derived SNPs  
228 were detected in 1KG JPT (Japanese living in Tokyo), the specific variants  
229 possessed by the Jomon people of the Kyushu region may not have been

230 detected, and thus the *JAS* in Kyushu may have been underestimated. In other  
231 words, these results could reflect differences in the genetic background of Jomon  
232 people in Tohoku and Kyushu. Overall, the geographical gradient of  $f_3$  in  
233 mainland Japan was more consistent with the *JAS* than the distances from the  
234 locations (Funadomari and Ikawazu) where Jomon samples were taken.

235

236 We assumed that the regional differences in the *JAS* were related to regional  
237 differences in population size during the Jomon period. Therefore, we examined  
238 the correlation between *JAS* and three indexes related to the Jomon population  
239 size. The *JAS* of each prefecture was significantly correlated with the number of  
240 archeological sites from the Jomon period ( $R = 0.69$ , two-sided  $t$ -test  $P = 1.27 \times 10^{-7}$ ;  
241 Fig. 4 (a)). The *JAS* of each region also correlated with the population size  
242 estimated from the number of archeological sites in the Late Jomon period ( $R =$   
243  $0.7$ , two-sided  $t$ -test  $P = 3.6 \times 10^{-2}$ ; Fig. 4 (b)). Moreover, the *JAS* of each  
244 prefecture was strongly correlated with  $\log_{10}(\text{number of archeological sites in the}$   
245  $\text{Yayoi period}/\text{number of archeological sites in the Late Jomon period})$  ( $R = -0.64$ ,  
246 two-sided  $t$ -test  $P = 2.08 \times 10^{-6}$ ; Fig. 4 (c)). It is considered that Figs. 4 (a) and (b)  
247 correspond to Jomon population size in the Jomon period and Fig. 4 (c)  
248 corresponds to the population growth rate occurring from the Late Jomon period  
249 to the Yayoi period. The correlation between *JAS* and population size in each  
250 region suggests that the smaller the population size in the Jomon period, the  
251 lower *JAS* in modern mainland Japan (i.e., the higher contribution of genomic  
252 components of immigrants from continental East Asia).

253

254 To summarize the above results, we can conclude that genetic differences  
255 among the regions of the modern Japanese population were mainly caused by  
256 differences in the admixture proportion of the Jomon people and that differences  
257 in the admixture proportion were caused by differences in the population sizes in  
258 each region during the Final Jomon period. Regarding these, previous  
259 morphological analyses showed that, of several populations in Japan, the  
260 Hokkaido Ainu and contemporary Kinki populations had contrasting cranial  
261 morphologies, while other modern regional populations were intermediate, with  
262 the Tohoku population being relatively similar in morphology to the Hokkaido  
263 Ainu(Hanihara 1985; Hanihara 1991). Archeological evidence suggests that  
264 immigrants from continental East Asia first reached northern Kyushu(Habu 2004),  
265 which seems contradictory considering that the *JAS* was lower in the Kinki and  
266 Shikoku regions than in northern Kyushu. The reason for this could be that the  
267 Kinki and Shikoku regions had a smaller population size during the Final Jomon  
268 period (Fig. 4), and thus, the proportion of genomic components derived from the  
269 immigrants became larger than in the other regions. In this study, we could clearly  
270 evaluate the similarity of local populations to the Jomon people using the Jomon-  
271 derived SNPs, and could clarify the main cause of genetic differences among the  
272 regional populations in mainland Japan.

273

#### 274 **PCA of prefectures according to Jomon allele frequency**

275

276 A PCA was conducted for 46 Japanese prefectures using Jomon allele  
277 frequencies (Supplementary Fig. 12 (a)). This PCA demonstrated that Okinawa

278 Prefecture was separated from the other prefectures by PC1. Next, 45  
279 prefectures in mainland Japan (Okinawa was excluded from further analyses  
280 based on Supplementary Fig. 12 (a)) were analyzed in PCA (Supplementary Fig.  
281 12 (b)). The PC1 showed that prefectures in the Tohoku and Kanto regions,  
282 where higher *JASs* were observed among Japanese prefectures, were greatly  
283 differentiated from prefectures in Kinki and Shikoku, where lower *JASs* were  
284 observed (Fig. 3). The *JAS* was strongly correlated with the PC1 of  
285 Supplementary Fig. 12 (b) ( $R = -0.94$ ,  $P < 2.2 \times 10^{-16}$ ; Supplementary Fig. 13),  
286 which shows that PC1 reflects the ancestry proportion of Jomon people in each  
287 prefecture. In contrast, the PC2 of Supplementary Fig. 12 (b) was strongly  
288 correlated with both the latitude and longitude of each prefecture (latitude:  $R =$   
289  $0.78$ , two-sided  $t$ -test  $P = 2.30 \times 10^{-10}$ , longitude:  $R = 0.66$ , two-sided  $t$ -test  $P =$   
290  $9.31 \times 10^{-7}$ ; Supplementary Fig. 14 (a) and (b)). These results indicate that the  
291 PC2 is determined by the geographical location of each prefecture, which might  
292 reflect that the genetic background of the Jomon people may differ according to  
293 the geographical locations in the Japanese archipelago. Previous studies have  
294 shown regional differences in the skeletal morphology of the Jomon people in the  
295 Japanese archipelago (Kaifu 1995; Maeda 2002; Takigawa 2006; Fukase et al.  
296 2012; Kondo et al. 2017). For example, Kondo et al. suggested that Jomon  
297 craniofacial morphology, especially in the neurocranium, exhibit a northeast-to-  
298 southwest geographical cline across the Japanese archipelago (Kondo et al.  
299 2017). To the best of our knowledge, including studies with ancient Jomon  
300 genomes, this is the first genome-wide study to refer to the genetic regional  
301 differences among the Jomon people in the Japanese archipelago.

302

303 **Haplotype structures composed of Jomon-derived SNPs in genes**  
304 **associated with characteristic phenotypes of East Asians**

305

306 To estimate the phenotype frequencies in the Jomon people, we investigated  
307 the haplotype structures of four genes (*ABCC11*, *EDAR*, *ALDH2*, and *ADH1B*),  
308 each having a nonsynonymous SNP associated with characteristic phenotypes  
309 of East Asians(Harada et al. 1981; Edenburg H.J. and Bosron W.F. 1997;  
310 Yoshiura et al. 2006; Fujimoto et al. 2008; Kimura et al. 2009). The derived alleles  
311 of these four nonsynonymous SNPs are associated with the following  
312 phenotypes: *ABCC11* rs17822931: dry ear wax(Yoshiura et al. 2006), *EDAR*  
313 rs3827760: thicker hair(Fujimoto et al. 2008) and shovel-shaped incisors(Kimura  
314 et al. 2009), and *ALDH2* rs671 and *ADH1B* rs1229984: lower alcohol  
315 tolerance(Harada et al. 1981; Edenburg H.J. and Bosron W.F. 1997). Haplotype  
316 structures composed of Jomon-derived SNPs are shown in Fig. 5. The  
317 haplotypes in each region could be classified into four types according to the  
318 presence or absence of the derived allele associated with the phenotype, and the  
319 composition of Jomon-derived alleles. The frequency of each haplotype in the  
320 Japanese population is presented in Table 1. Here, the haplotypes containing the  
321 Jomon-derived SNPs are called “Jomon-derived haplotypes.” For *ABCC11* and  
322 *EDAR*, Jomon-derived haplotypes were observed for both ancestral and derived  
323 alleles of the phenotype-associated SNPs. In *ABCC11* (Fig. 5 (a)), the  
324 frequencies of the Jomon-derived haplotypes in mainland Japanese were 10.6%  
325 for the ancestral allele (wet ear wax) and 24% for the derived allele (dry ear wax).

326 In *EDAR* (Fig. 5 (b)), the Jomon-derived haplotype frequencies were 14.9% for  
327 the ancestral allele (thinner hair and non-shovel-shaped incisors) and 17.3% for  
328 the derived allele (thicker hair and shovel-shaped incisors) in mainland Japanese.  
329 The haplotypes containing ancestral and derived alleles of the phenotype-  
330 associated SNPs had different Jomon alleles. Thus, it is unlikely that these  
331 haplotypes were generated by recombination in the Japanese population after  
332 the admixture between the Jomon and immigrants from continental East Asia.  
333 The present results suggest that modern Japanese have derived alleles from  
334 both the Jomon people and immigrants from continental East Asia in *EDAR* and  
335 *ABCC11*. Previous studies examining ancient DNA of the Hokkaido Jomon  
336 population obtained from archeological sites showed that the derived allele (dry  
337 ear wax) of *ABCC11* was present in the Hokkaido Jomon population at a  
338 frequency of 47.6%(Sato et al. 2009; Kazuta et al. 2011). As for *EDAR*, although  
339 the frequency of the derived allele (shovel-shaped incisors and thicker hair) in the  
340 Jomon people has not been estimated, it has been shown that shovel-shaped  
341 incisors were found at a frequency of 68.9% in the Jomon people(Matsumura  
342 1994). The results of these previous studies are consistent with our results. In  
343 *ALDH2* rs671 (Fig. 5 (c)), the Jomon-derived haplotypes containing the derived  
344 allele of phenotype-associated SNPs were found to be rare (2.4%) in modern  
345 Japanese, and the number of Jomon alleles per Jomon-derived haplotype  
346 containing the derived allele was very small. This suggests that the Jomon people  
347 had few derived alleles (lower alcohol tolerance) of rs671, and most of the derived  
348 alleles found in modern Japanese originated from continental East Asians. In  
349 *ADH1B* rs1229984 (Fig. 5 (d)), the total frequency of the Jomon-derived

350 haplotypes was relatively lower than that of the other three genes. The  
351 frequencies of the Jomon-derived haplotype were 3.8% for the ancestral allele  
352 (higher alcohol tolerance) and 4.8% for the derived allele (lower alcohol  
353 tolerance). In addition, when we calculated the number of Jomon-derived SNPs  
354 per 1 Mb at the genome-wide scale (Supplementary Fig. 15), we found that the  
355 number of Jomon-derived SNPs was especially small in the region around  
356 *ADH1B* (red dashed line). Therefore, regarding *ADH1B*, it is possible that the  
357 Jomon people possessed the derived allele of rs1229984 at a higher frequency  
358 compared to that of *ALDH2*, but both the Jomon-derived haplotypes with  
359 ancestral and derived alleles may have been lost after the admixture in Japanese.  
360 Koganebuchi et al., (Koganebuchi et al. 2017) previously estimated that most of  
361 the derived alleles in *ALDH2* originated from immigrants from continental East  
362 Asia, which agrees with our results, while they concluded that the genetic  
363 contribution of immigrants was small for *ADH1B*, which contradicts the results of  
364 this study. Their study(Koganebuchi et al. 2017) assumed that, among mainland  
365 Japanese, the population in northern Kyushu had a relatively large genetic  
366 contribution from immigrants, but this assumption is inconsistent with the *JAS*  
367 estimated in the present study (Fig. 3 (b)). Thus, it is more plausible that *ADH1B*  
368 haplotypes of mainland Japanese were introduced mainly by immigrants from  
369 continental East Asia, regardless of the allelic status (ancestral or derived) of  
370 rs1229984.



371 **Discussion**

372

373 In this study, we developed the *AMI* as a summary statistic to detect the  
374 Jomon-derived variants in modern Japanese without requiring any genomic  
375 sequences from the former. The computer simulation showed that *AMI* can detect  
376 ancestral variants with high accuracy, even in an admixed population whose  
377 source populations diverged tens of thousands of years ago. Since we were able  
378 to detect Jomon-derived SNPs by the *AMI* even changing the population history  
379 in the simulations, the present approach using the *AMI* is likely to be applied to  
380 other admixed populations which source population whose source populations  
381 diverged relatively recently. Potential applications include the population of  
382 Madagascar(Pierron et al. 2017; Pierron et al. 2018) and the current Polynesian  
383 population(Skoglund et al. 2016; Pugach et al. 2018), which were formed around  
384 hundreds to thousands years ago by population admixture. As exemplified by  
385 these cases, the genetic diversity of modern humans has been greatly influenced  
386 by population admixture events(Lazaridis et al. 2014; Nielsen et al. 2017). The  
387 *AMI* will be a powerful tool for clarifying the population history of not only the  
388 Japanese but also other admixed populations.

389

390 As for the process of population formation in the Japanese archipelago from  
391 the Late Jomon period to the present, we propose a model, which is shown in Fig.  
392 6. From the Late to Final Jomon period, the Jomon people settled down in  
393 mainland Japan, and the population size or the population density of the Jomon  
394 people varied among regions. According to Koyama 1979(Koyama 1979), based

395 on the number of archeological sites, it was estimated that the population sizes  
396 in the Tohoku and Kanto regions were relatively large at 43,800 and 52,100,  
397 respectively, while those in the Kinki and Shikoku regions were relatively small at  
398 4,400 and 2,700, respectively. Thus, in the Kinki and Shikoku regions, modern  
399 Japanese have lower degrees of genomic components derived from the Jomon  
400 people. In the Final Jomon period, continental East Asians arrived in northern  
401 Kyushu and started to admix with the Jomon people in all regions of mainland  
402 Japan. During the Yayoi period, the population size of immigrants was relatively  
403 increased in the Kinki and Shikoku regions, where the populations were small at  
404 the end of the Jomon period. Further analyses of ancient human DNA from the  
405 Final Jomon period to the Yayoi period will allow the verification of the Japanese  
406 population history model proposed in this study.

## 407 **Methods**

408

### 409 **Coalescent simulation by Msprime**

410

411 To investigate the characteristics of the Jomon-derived autosomal genomic  
412 components of mainland Japanese, we conducted a coalescent simulation  
413 assuming the admixture of the Jomon and continental East Asians using  
414 msprime(Kelleher et al. 2016) (Supplementary Fig. 2). A feature of the msprime  
415 program is that it specifies the time and population where the mutation and  
416 coalescence occurred. Our simulation code was made with reference to a  
417 previous study(Browning et al. 2018). The split between the Jomon ancestors  
418 and continental East Asians was set to 1,200 generations ago (30,000 YBP),  
419 according to the divergence time estimated in Kanzawa-Kiriyama et al.,  
420 (Kanzawa-Kiriyama et al. 2019) (between 18,000 YBP and 38,000 YBP) and the  
421 beginning of the Jomon period (around 16,000 YBP)(Habu 2004). Migration from  
422 continental East Asia to mainland Japan was set between 120 and 80  
423 generations ago, with reference to the beginning of the Yayoi period, around  
424 2,800 years ago(Fujio 2015). The total admixture proportion of the Jomon people  
425 in the modern mainland Japanese was set to 12%(Kanzawa-Kiriyama et al. 2017).  
426 The effective population size was set to 5,000 for both populations. The mutation  
427 rate and recombination rate were set to  $1.2 \times 10^{-8}$  per bp per generation and  
428  $1.3 \times 10^{-8}$  per bp per generation, respectively(International Human Genome  
429 Sequencing Consortium 2001; Altshuler et al. 2010; Kong et al. 2012; Scally and  
430 Durbin 2012).

431

432 This study aimed to detect Jomon-derived variants based on LD among  
433 Japanese specific variants. There are three types of Japanese specific variants:  
434 (type 1) Jomon-derived variants, which appeared in the Jomon lineage before the  
435 admixture event; (type 2) variants derived from continental East Asians, which  
436 appeared in the continental East Asian populations and were moved into the  
437 Japanese lineages through the admixture, but were eventually lost in the East  
438 Asian population; and (type 3) novel variants that appeared only in Japanese  
439 lineages after the admixture. It is worth noting that Japanese specific variants  
440 generated earlier than the split time of the Jomon people and the continental East  
441 Asians were classified as Jomon-derived variants (type 1). Of these Japanese  
442 specific variants, the Jomon-derived variants (type 1) are considered to be  
443 accumulated on the same haplotype or to be in strong LD with each other  
444 (Supplementary Fig. 4 (b)). We compared the LD status of three types of  
445 Japanese specific variants by coalescent simulations. The origin of each  
446 haplotype of mainland Japanese can be estimated by coalescent time to the  
447 haplotypes of the Jomon or continental East Asians by msprime simulations. That  
448 is, if a haplotype of a mainland Japanese sample coalesced with haplotypes of  
449 Jomon samples earlier than the admixture of the Jomon people and continental  
450 East Asians, the haplotype is inferred to be derived from Jomon. To extract the  
451 three types of Japanese specific variants (i.e., variants not found in samples from  
452 continental East Asians), 3,000 replicates of 1 Mb simulations were performed.  
453 We sampled 200 haplotypes from each of the four populations (modern mainland  
454 Japanese, modern continental East Asians, Jomon people 120 generations ago,

455 and continental East Asians 120 generations ago) to detect variants observed in  
456 modern mainland Japanese but not seen in continental East Asians. Each  
457 Japanese specific variant was classified into (type 1) the Jomon-derived variant,  
458 (type 2) the continental East Asian-derived variant, and (type 3) the novel variant  
459 based on when and in which lineage the mutation occurred (Supplementary Fig.  
460 4 (a)). For each type of the Japanese specific variant, the ancestry marker index  
461 (*AMI*) was calculated as:

462 *AMI*

$$463 = \frac{\{\text{Number of variants with linkage disequilibrium coefficients } (r^2) > 0.01\}}{\text{(Number of Japanese specific variants per KB)}}$$

464 Jomon-derived variants are expected to have higher *AMI* values. The  
465 performance of the *AMI* was verified by receiver operating characteristic (ROC)  
466 analysis using the ROCR package in R. The threshold to detect Jomon-derived  
467 variants was determined based on the Youden Index.

468

## 469 **Detection and verification of Jomon-derived SNPs on autosomes using real** 470 **data**

471

### 472 **Detection of Jomon-derived variants in real data**

473 Jomon-derived SNPs were inferred from the whole genome sequence data  
474 from 26 populations from different parts of the world, including mainland  
475 Japanese (JPT) and four continental East Asian populations (CHB, CHS, CDX,  
476 and KHV), obtained from the 1000 Genomes Project Phase III (1KG)(Auton et al.  
477 2015), and 87 individuals from the Korean Personal Genome Project(Zhang et al.  
478 2014). In this study, only biallelic SNPs were used. Prior to extracting the Jomon-

479 derived SNPs, we performed a principal component analysis (PCA) in PLINK  
480 (version 1.9)(Purcell et al. 2007) using 1KG mainland Japanese (JPT) and Han  
481 Chinese (CHB) data. During this analysis, we found that one JPT individual  
482 (NA18976) was close to the continental East Asians (Supplementary Fig. 8), so  
483 NA18976 was excluded from subsequent analyses. First, 1,784,634 SNPs  
484 specific to 1KG JPT were detected using VCFtools v0.1.13(Danecek et al. 2011).  
485 Next, LD coefficients ( $r^2$ ) were calculated between the Japanese specific SNPs  
486 located within 1 Mb from each other with the --hap-r2 option of VCFtools in  
487 combination with the --ld-window-bp option. The number of SNPs with  $r^2 > 0.01$   
488 was counted for each Japanese specific SNP. The density of Japanese specific  
489 variants per 1 kb of each chromosome was calculated using the --SNPdensity  
490 option of VCFtools, and the *AMI* was calculated for each Japanese specific SNP.  
491 To eliminate the possibility of sequence errors, regions with a density of Japanese  
492 specific variants per kb below a mean of - 1sd of each chromosome were  
493 excluded from the analysis. In this analysis, we assumed that the number of  
494 Japanese specific variants per kb, which is the denominator of the *AMI*, is  
495 constant for each chromosome (i.e., the numerator of the *AMI* was normalized  
496 for each chromosome). Based on the threshold set by the ROC analysis of  
497 simulated Japanese specific variants, we inferred variants originating from the  
498 Jomon people.

499

500 **Verification of Jomon-derived SNPs based on whole-genome sequence**  
501 **data from Jomon remains**

502 For the verification of Jomon-derived SNPs based on the whole genome  
503 sequence data, the “Jomon allele score” (*JAS*) was calculated for the  
504 Ikawazu(Mccoll et al. 2018; Gakuhari et al. 2020) and Funadomari(Kanzawa-  
505 Kiriya et al. 2019) Jomon, as well as for 104 individuals from the 1KG JPT.  
506 The *JAS* was calculated using the following formula:

$$507 \quad JAS = \frac{(\text{Jomon derived allele count})}{2 * (\text{Number of total Jomon-derived SNPs})}$$

508 The BAM file of the Ikawazu Jomon was provided by Hiroki Ota of Tokyo  
509 University, Tokyo, Japan, and Takashi Gakuhari of Kanazawa University,  
510 Ishikawa, Japan. The BAM file of the Funadomari Jomon was provided by Naruya  
511 Saito from the National Institute of Genetics, Shizuoka, Japan, and Hideaki  
512 Kanzawa-Kiriya from the National Museum of Nature and Science, Tokyo,  
513 Japan. The genotypes of Ikawazu Jomon and Funadomari Jomon samples were  
514 called by the UnifiedGenotyper tool in the GenomeAnalysisToolkit version  
515 3.6(McKenna et al. 2010). For the Ikawazu Jomon, the --mbq 30 --ploidy 2 --  
516 output\_mode EMIT\_ALL\_CONFIDENT\_SITES options were specified. For the  
517 Funadomari Jomon, the options described in the original paper were specified.  
518 Jomon SNPs were subjected to LD pruning by the --indep-pairwise command of  
519 PLINK (--indep-pairwise 1000 200 0.8). In addition, only the Jomon-derived SNPs  
520 of depth  $\geq 6$  in the Ikawazu and Funadomari Jomon were used for the calculation  
521 of the *JAS*. As a result, 4,458 SNPs were used to calculate *JAS*.

522

523 **Detection of regional genetic differences in mainland Japanese by Jomon-**  
524 **derived SNPs**

525

## 526 **Sample data**

527 We used 183,708 SNPs from 10,842 individuals from the Japanese  
528 archipelago published by Watanabe et al.(Watanabe et al. 2020). All the  
529 individuals investigated in this study were customers of the Japanese Direct to  
530 Consumer (DTC) genetic-testing service, HealthData Lab (Yahoo! Japan  
531 Corporation, Tokyo, Japan). They were provided an agreement, and informed  
532 consent was obtained for their data to be used for research. In this study, the  
533 Japanese archipelago was divided roughly into eleven regions (Fig. 1 and  
534 Supplementary Table 1): Hokkaido (430 individuals), Tohoku (746 individuals),  
535 Kanto (3,990 individuals), Hokuriku (431 individuals), Chubu (410 individuals),  
536 Tokai (933 individuals), Kinki (1,861 individuals), Chugoku (600 individuals),  
537 Shikoku (314 individuals), Kyushu (1,016 individuals), and Okinawa (111  
538 individuals). All statistical analyses were conducted at the Yahoo! Japan  
539 Corporation, with personal information of the customers completely hidden. We  
540 obtained approval from the Ethics Committee of the Yahoo! Japan Corporation.

541

## 542 **Imputation of genotypes of Jomon-derived SNPs**

543 Haplotype phasing and genotype imputation were performed using  
544 EAGLE2(Loh et al. 2016) and Minimac3(Das et al. 2016), respectively, with whole  
545 genome sequence data of 413 mainland Japanese(Watanabe et al. 2019)  
546 phased by SHAPEIT2(Delaneau et al. 2013). After the imputation, Jomon-derived  
547 SNPs with high imputation quality ( $R^2 > 0.8$ ) were extracted. Also, LD pruning  
548 was performed with PLINK (--indep-pairwise 1000 200 0.1), and a total of 3,917  
549 Jomon-derived SNPs were used for the analysis.



550

### 551 **Geographical distribution of the Jomon allele score**

552 In subsequent analyses, individuals from Hokkaido that were largely affected  
553 by immigration after the Meiji period were excluded. Using 3,917 Jomon-derived  
554 SNPs, we calculated the *JAS* for individuals of each prefecture and compared  
555 them between regions and prefectures.

556

### 557 ***f*3-testing of prefectural populations in Japan**

558 The *f*3-test(Patterson et al. 2012) was carried out in order to examine the  
559 relatedness between contemporary populations of each prefecture in Japan and  
560 the Funadomari Jomon or Ikawazu Jomon. Each Jomon sample and the 1KG  
561 CHB were set as the source populations of admixture, and each prefecture of  
562 Japan was set as the target population, (described as *f*3(each prefecture; Jomon,  
563 CHB)) . LD pruning was carried out on whole genome SNPs common in the  
564 Japanese, 1KG CHB, Funadomari Jomon, and Ikawazu Jomon by PLINK (--  
565 indep-pairwise 1000 200 0.1), with 17,492 SNPs being used for subsequent  
566 analyses. For the Funadomari and Ikawazu Jomon people, VCF files were  
567 converted to PED files using VCFtools and combined with the PED file of the  
568 Japanese. The PED files were converted to eigenstrat format with the  
569 Admixtools(Patterson et al. 2012) convertf command, and then the *f*3-test was  
570 conducted with the Admixtools qp3Pop command.

571

### 572 **Examination of correlations between population size during the Jomon** 573 **period and *JAS* in each prefecture**

574 We compared the population size estimated from the number of  
575 archeological sites in each prefecture, assuming that the population size per  
576 archeological site was constant in each prefecture during the same period. We  
577 examined the correlations between (a) the average *JAS* in each prefecture and  
578 the number of archeological sites from the Jomon period (obtained from the  
579 Statistical report of buried cultural properties, Agency of Cultural Affairs, Japan;  
580 [https://www.bunka.go.jp/seisaku/bunkazai/shokai/pdf/h29\\_03\\_maizotokei.pdf](https://www.bunka.go.jp/seisaku/bunkazai/shokai/pdf/h29_03_maizotokei.pdf)),  
581 (b) the average *JAS* in each region and the population size estimated from the  
582 number of archeological sites in the Late Jomon period(Koyama 1979), and (c)  
583 the average *JAS* in each prefecture and the  $\log_{10}$ (number of archeological sites  
584 in the Yayoi period/number of archeological sites in the Late Jomon  
585 period)(Koyama 1979). Finally, (a) and (c) were plotted for each prefecture, while  
586 (b) was plotted for each region because data for each prefecture were not  
587 available. Correlation test was conducted by R `cor.test` function ( $df = 43$ ).

588

### 589 **PCA based on the Jomon allele frequencies of each prefecture**

590 The Jomon allele frequency was calculated for 50 randomly sampled  
591 individuals from each prefecture using VCFtools version 0.1.13. A PCA was  
592 performed based on the Jomon allele frequency using R version 3.6.0.  
593 Correlation test between PC1 and *JAS*, and PC2 and longitude/latitude were  
594 conducted by R `cor.test` function ( $df = 43$ ).

595

### 596 **Analysis of haplotype structures composed of Jomon-derived SNPs in four** 597 **genes associated with characteristic phenotypes of East Asians**

598 We investigated the haplotype structures composed of Jomon-derived SNPs  
599 in the regions surrounding SNPs associated with characteristic phenotypes of  
600 East Asians (*ABCC11*: rs17822931(Yoshiura et al. 2006), *EDAR*:  
601 rs3827760(Fujimoto et al. 2008; Kimura et al. 2009), *ALDH2*: rs671(Harada et al.  
602 1981; Oota et al. 2004; Li et al. 2009; Luo et al. 2009; Koganebuchi et al. 2017),  
603 and *ADH1B*: rs1229984(Edenburg H.J. and Bosron W.F. 1997; Osier et al. 1999;  
604 Osier et al. 2002; Han et al. 2007; Li et al. 2007)). The --IMPUTE option of  
605 VCFtools was used to extract haplotypes composed of Jomon-derived SNPs in  
606 regions 500 kb upstream and downstream (1 Mb in total) of the SNPs associated  
607 with phenotypes from the phased 1KG JPT whole genome dataset.

608

#### 609 **Data availability**

610 The individual genotypes of 10,842 Japanese analyzed in this study are  
611 not available to avoid personal identification. The list of Jomon-derived SNPs  
612 detected in this study, and the allele frequencies of Jomon-derived SNPs in each  
613 Japanese prefecture are available from the corresponding author upon request.  
614 Our custom code for msprime simulation are available from the corresponding  
615 author upon request.

616

- 617 Altshuler DL, Durbin RM, Abecasis GR, Bentley DR, Chakravarti A, Clark AG,  
618 Collins FS, De La Vega FM, Donnelly P, Egholm M, et al. 2010. A map of  
619 human genome variation from population-scale sequencing. *Nature*  
620 467:1061–1073.
- 621 Auton A, Abecasis GR, Altshuler DM, Durbin RM, Abecasis GR, Bentley DR,  
622 Chakravarti A, Clark AG, Donnelly P, Eichler EE, et al. 2015. A global  
623 reference for human genetic variation. *Nature* 526:68–74.
- 624 Baran Y, Pasaniuc B, Sankararaman S, Torgerson DG, Gignoux C, Eng C,  
625 Rodriguez-Cintron W, Chapela R, Ford JG, Avila PC, et al. 2012. Fast and  
626 accurate inference of local ancestry in Latino populations. *Bioinformatics*  
627 28:1359–1367.
- 628 Browning SR, Browning BL, Zhou Y, Tucci S, Akey JM. 2018. Analysis of  
629 Human Sequence Data Reveals Two Pulses of Archaic Denisovan  
630 Admixture. *Cell* 173:1–9.
- 631 Churchhouse C, Marchini J. 2013. Multiway Admixture Deconvolution Using  
632 Phased or Unphased Ancestral Panels. *Genet. Epidemiol.* 37:1–12.
- 633 Danecek P, Auton A, Abecasis G, Albers CA, Banks E, DePristo MA,  
634 Handsaker RE, Lunter G, Marth GT, Sherry ST, et al. 2011. The variant call  
635 format and VCFtools. *Bioinformatics* 27:2156–2158.
- 636 Das S, Forer L, Schönherr S, Sidore C, Locke AE, Kwong A, Vrieze SI, Chew  
637 EY, Levy S, McGue M, et al. 2016. Next-generation genotype imputation  
638 service and methods. *Nat. Genet.* 48:1284–1287.
- 639 Delaneau O, Zagury JF, Marchini J. 2013. Improved whole-chromosome  
640 phasing for disease and population genetic studies. *Nat. Methods* 10:5–6.

- 641 Edenburg H.J., Bosron W.F. 1997. Alcohol dehydrogenases. In:  
642       Comprehensive Toxicology, Vol. 3: Biotransformation. (Guengerich F.P,  
643       editor.). New York: Pergamon Elsevier Science
- 644 Fujimoto A, Kimura R, Ohashi J, Omi K, Yuliwulandari R, Batubara L, Mustofa  
645       MS, Samakkarn U, Settheetham-ishida W, Ishida T, et al. 2008. A scan for  
646       genetic determinants of human hair morphology: EDAR is associated with  
647       Asian hair thickness. *Hum. Mol. Genet.* 17:835–843.
- 648 Fujio S. 2015. *History of Yayoi Period*. Tokyo: Kodansha
- 649 Fukase H, Wakebe T, Tsurumoto T, Saiki K, Fujita M, Ishida H. 2012.  
650       Geographic variation in body form of prehistoric Jomon males in the  
651       Japanese archipelago: Its ecogeographic implication. *Am. J. Phys.*  
652       *Anthropol.* 149:125–135.
- 653 Gakuhari T, Nakagome S, Rasmussen S, Allentoft ME, Sato T, Chuiñneagáin  
654       BN, Matsumae H, Koganebuchi K, Schmidt R, Mizushima S, et al. 2020.  
655       Ancient Jomon genome sequence analysis sheds light on migration  
656       patterns of early East Asian. *Commun. Biol.* 3:1–10.
- 657 Guan Y. 2014. Detecting structure of haplotypes and local ancestry. *Genetics*  
658       196:625–642.
- 659 Habu J. 2004. *Ancient Jomon of Japan*. Cambridge University Press Available
- 660 Han Y, Gu S, Oota H, Osier M V., Pakstis AJ, Speed WC, Kidd JR, Kidd KK.  
661       2007. Evidence of positive selection on a class I ADH locus. *Am. J. Hum.*  
662       *Genet.* 80:441–456.
- 663 Hanihara K. 1985. Geographic variation of modern Japanese crania and its  
664       relationship to the origin of Japanese. *Homo* 36:1–10.

- 665 Hanihara K. 1991. Dual structure model for the population history of the  
666 Japanese. *Japan Rev.* 2:1–33.
- 667 Harada S, Agarwal DP, Goedde HW. 1981. Aldehyde Dehydrogenase  
668 Deficiency As Cause of Facial Flushing Reaction To Alcohol in Japanese.  
669 *Lancet* 318:982.
- 670 Hui D, Fang Z, Lin J, Duan Q, Li Y, Hu M, Chen W. 2017. LAIT: A local ancestry  
671 inference toolkit. *BMC Genet.* 18:1–5.
- 672 International Human Genome Sequencing Consortium. 2001. Initial sequencing  
673 and analysis of the human genome International Human Genome. *Nature*  
674 409:860–921.
- 675 Jinam T, Nishida N, Hirai M, Kawamura S, Oota H, Umetsu K, Kimura R,  
676 Ohashi J, Tajima A, Yamamoto T, et al. 2012. The history of human  
677 populations in the Japanese Archipelago inferred from genome-wide SNP  
678 data with a special reference to the Ainu and the Ryukyuan populations. *J.*  
679 *Hum. Genet.* 57:787–795.
- 680 Jinam TA, Kanzawa-Kiriyama H, Inoue I, Tokunaga K, Omoto K, Saitou N.  
681 2015. Unique characteristics of the Ainu population in Northern Japan. *J.*  
682 *Hum. Genet.* 60:565–571.
- 683 Kaifu Y. 1995. Regional variation in mandibular morphology of the Jomon  
684 people. *Bull Natl Sci Mus* 21:37–50.
- 685 Kanzawa-Kiriyama H, Jinam TA, Kawai Y, Sato T, Hosomichi K, Tajima A,  
686 Adachi N, Matsumura H, Kryukov K, Saitou N, et al. 2019. Late Jomon  
687 male and female genome sequences from the Funadomari site in  
688 Hokkaido , Japan. *Anthropol. Sci.* 127:83–108.

- 689 Kanzawa-Kiriyama H, Kryukov K, Jinam TA, Hosomichi K, Saso A, Suwa G,  
690 Ueda S, Yoneda M, Tajima A, Shinoda K, et al. 2017. A partial nuclear  
691 genome of the Jomons who lived 3000 years ago in Fukushima, Japan. *J.*  
692 *Hum. Genet.* 62:213–221.
- 693 Kazuta H, Sato T, Dodo Y, Matsumura H, Amano T, Ishida H, Masuda R. 2011.  
694 Genotype frequencies of the ABCC11 gene in 2000-3000-year-old human  
695 bones from the Epi-Jomon and Jomon sites in Hokkaido, Japan. *Anthropol.*  
696 *Sci.* 119:81–86.
- 697 Kelleher J, Etheridge AM, McVean G. 2016. Efficient Coalescent Simulation and  
698 Genealogical Analysis for Large Sample Sizes. *PLoS Comput. Biol.* 12:1–  
699 22.
- 700 Kimura R, Yamaguchi T, Takeda M, Kondo O, Toma T, Haneji K, Hanihara T,  
701 Matsukusa H, Kawamura S, Maki K, et al. 2009. A Common Variation in  
702 EDAR Is a Genetic Determinant of Shovel-Shaped Incisors. *Am. J. Hum.*  
703 *Genet.* 85:528–535.
- 704 Koganebuchi K, Haneji K, Toma T, Joh K, Soejima H, Fujimoto K, Ishida H,  
705 Ogawa M, Hanihara T, Harada S, et al. 2017. The allele frequency of  
706 ALDH2\*Glu504Lys and ADH1B\*Arg47His for the Ryukyu islanders and  
707 their history of expansion among East Asians. *Am. J. Hum. Biol.* 29:1–14.
- 708 Kondo O, Fukase H, Fukumoto T. 2017. Regional variations in the Jomon  
709 population revisited on craniofacial morphology. *Anthropol. Sci.* 125:85–  
710 100.
- 711 Kong A, Frigge ML, Masson G, Besenbacher S, Sulem P, Magnusson G,  
712 Gudjonsson SA, Sigurdsson A, Jonasdottir Aslaug, Jonasdottir Adalbjorg,

- 713 et al. 2012. Rate of de novo mutations and the importance of father-s age  
714 to disease risk. *Nature* 488:471–475.
- 715 Koyama S. 1979. Jomon Subsistence and Population. *Senri Ethnol. Stud.* 2:1–  
716 65.
- 717 Lazaridis I, Patterson N, Mitnik A, Renaud G, Mallick S, Kirsanow K, Sudmant  
718 PH, Schraiber JG, Castellano S, Lipson M, et al. 2014. Ancient human  
719 genomes suggest three ancestral populations for present-day Europeans.  
720 *Nature* 513:409–413.
- 721 Li H, Borinskaya S, Yoshimura K, Kal’ina N, Marusin A, Stepanov VA, Qin Z,  
722 Khaliq S, Lee MY, Yang Y, et al. 2009. Refined geographic distribution of  
723 the oriental ALDH2\* 504Lys (nee 487Lys) variant. *Ann. Hum. Genet.*  
724 73:335–345.
- 725 Li H, Mukherjee N, Soundararajan U, Tárnok Z, Barta C, Khaliq S, Mohyuddin  
726 A, Kajuna SLB, Mehdi SQ, Kidd JR, et al. 2007. Geographically separate  
727 increases in the frequency of the derived ADH1B\*47His allele in eastern  
728 and western Asia. *Am. J. Hum. Genet.* 81:842–846.
- 729 Loh PR, Danecek P, Palamara PF, Fuchsberger C, Reshef YA, Finucane HK,  
730 Schoenherr S, Forer L, McCarthy S, Abecasis GR, et al. 2016. Reference-  
731 based phasing using the Haplotype Reference Consortium panel. *Nat.*  
732 *Genet.* 48:1443–1448.
- 733 Luo HR, Wu GS, Pakstis AJ, Tong L, Oota H, Kidd KK, Zhang YP. 2009. Origin  
734 and dispersal of atypical aldehyde dehydrogenase ALDH2\*487Lys. *Gene*  
735 435:96–103.



- 736 Maeda T. 2002. Mandibular ramus morphology of the Jomon people from  
737 Hokkaido. *Anthropological. Anthropol. Sci. (Japanese Ser. 110:27–40.*
- 738 Matsumura H. 1994. A Microevolutional History of the Japanese People from a  
739 Dental Characteristics Perspective. *Anthropol. Sci. 102:93–118.*
- 740 Mccoll H, Racimo F, Vinner L, Demeter F, Gakuhari T, Moreno-mayar JV,  
741 Driem G Van, Wilken UG, Seguin-orlando A, De C, et al. 2018. The  
742 prehistoric peopling of Southeast Asia. *Science (80-. ). 361:88–92.*
- 743 McKenna A, Hanna M, Banks E, Sivachenko A, Cibulskis K, Kernytzky A,  
744 Garimella K, Altshuler D, Gabriel S, Daly M, et al. 2010. The genome  
745 analysis toolkit: A MapReduce framework for analyzing next-generation  
746 DNA sequencing data. *Genome Res. 20:1297–1303.*
- 747 Mizoguchi K. 2013. *The archaeology of Japan : from the earliest rice farming*  
748 *villages to the rise of the state. Cambridge: Cambridge University Press*
- 749 Nakagome S, Sato T, Ishida H, Hanihara T, Yamaguchi T, Kimura R, Mano S,  
750 Oota H, Omoto K, Tokunaga K, et al. 2015. Model-based verification of  
751 hypotheses on the origin of modern Japanese revisited by Bayesian  
752 inference based on genome-wide SNP data. *Mol. Biol. Evol. 32:1533–*  
753 *1543.*
- 754 Nielsen R, Akey JM, Jakobsson M, Pritchard JK, Tishkoff S, Willerslev E. 2017.  
755 *Tracing the peopling of the world through genomics. Nature 541:302–310.*
- 756 Oota H, Pakstis AJ, Bonne-Tamir B, Goldman D, Grigorenko E, Kajuna SLB,  
757 Karoma NJ, Kungulilo S, Lu RB, Odunsi K, et al. 2004. The evolution and  
758 population genetics of the ALDH2 locus: Random genetic drift, selection,  
759 and low levels of recombination. *Ann. Hum. Genet. 68:93–109.*

- 760 Osier M, Pakstis AJ, Kidd JR, Lee JF, Yin SJ, Ko HC, Edenberg HJ, Lu RB,  
761 Kidd KK. 1999. Linkage disequilibrium at the ADH2 and ADH3 loci and risk  
762 of alcoholism. *Am. J. Hum. Genet.* 64:1147–1157.
- 763 Osier M V., Pakstis AJ, Soodyall H, Comas D, Goldman D, Odunsi A, Okonofua  
764 F, Parnas J, Schulz LO, Bertranpetit J, et al. 2002. A global perspective on  
765 genetic variation at the ADH genes reveals unusual patterns of linkage  
766 disequilibrium and diversity. *Am. J. Hum. Genet.* 71:84–99.
- 767 Patterson N, Moorjani P, Luo Y, Mallick S, Rohland N, Zhan Y, Genschoreck T,  
768 Webster T, Reich D. 2012. Ancient admixture in human history. *Genetics*  
769 192:1065–1093.
- 770 Pierron D, Heiske M, Razafindrazaka H, Pereda-Loth V, Sanchez J, Alva O,  
771 Arachiche A, Boland A, Olasso R, Deleuze JF, et al. 2018. Strong selection  
772 during the last millennium for African ancestry in the admixed population of  
773 Madagascar. *Nat. Commun.* 9:1–9.
- 774 Pierron D, Heiske M, Razafindrazaka H, Rakoto I, Rabetokotany N,  
775 Ravololomanga B, Rakotozafy LMA, Rakotomalala MM, Razafiarivony M,  
776 Rasoarifetra B, et al. 2017. Genomic landscape of human diversity across  
777 Madagascar. *Proc. Natl. Acad. Sci. U. S. A.* 114:E6498–E6506.
- 778 Plagnol V, Wall JD. 2006. Possible ancestral structure in human populations.  
779 *PLoS Genet.* 2:e105.
- 780 Price AL, Tandon A, Patterson N, Barnes KC, Rafaels N, Ruczinski I, Beaty TH,  
781 Mathias R, Reich D, Myers S. 2009. Sensitive detection of chromosomal  
782 segments of distinct ancestry in admixed populations. *PLoS Genet.*  
783 5:e1000519.

- 784 Pugach I, Duggan AT, Merriwether DA, Friedlaender FR, Friedlaender JS,  
785 Stoneking M. 2018. The gateway from near into remote oceania: New  
786 insights from genome-wide data. *Mol. Biol. Evol.* 35:871–886.
- 787 Purcell S, Neale B, Todd-Brown K, Thomas L, Ferreira MAR, Bender D, Maller  
788 J, Sklar P, De Bakker PIW, Daly MJ, et al. 2007. PLINK: A tool set for  
789 whole-genome association and population-based linkage analyses. *Am. J.*  
790 *Hum. Genet.* 81:559–575.
- 791 Sato T, Amano T, Ono H, Ishida H, Kodera H, Matsumura H, Yoneda M,  
792 Masuda R. 2009. Allele frequencies of the ABCC11 gene for earwax  
793 phenotypes among ancient populations of Hokkaido, Japan. *J. Hum.*  
794 *Genet.* 54:409–413.
- 795 Scally A, Durbin R. 2012. Revising the human mutation rate: Implications for  
796 understanding human evolution. *Nat. Rev. Genet.* 13:745–753.
- 797 Skoglund P, Posth C, Sirak K, Spriggs M, Valentin F, Bedford S, Clark GR,  
798 Reepmeyer C, Petchey F, Fernandes D, et al. 2016. Genomic insights into  
799 the peopling of the Southwest Pacific. *Nature* 538:510–513.
- 800 Takigawa W. 2006. Inter-regional variation of metric traits of limb bones in  
801 Jomon and modern Japanese. *Anthropological. Anthropol. Sci.* (Japanese  
802 Ser. 114:101–129.
- 803 Vernot B, Akey JM. 2014. Resurrecting Surviving Neandertal Lineages from  
804 Modern Human Genomes. *Science* (80-. ). 343:1017–1021.
- 805 Watanabe Y, Isshiki M, Ohashi J. 2020. Prefecture-level population structure of  
806 the Japanese based on SNP genotypes of 11,069 individuals. *J. Hum.*  
807 *Genet.* In press.

808 Watanabe Y, Naka I, Khor S-S, Sawai H, Hitomi Y, Tokunaga K, Ohashi J.  
809 2019. Analysis of whole Y-chromosome sequences reveals the Japanese  
810 population history in the Jomon period. *Sci. Rep.* 9:8556.

811 Yamaguchi-Kabata Y, Nakazono K, Takahashi A, Saito S, Hosono N, Kubo M,  
812 Nakamura Y, Kamatani N. 2008. Japanese Population Structure, Based on  
813 SNP Genotypes from 7003 Individuals Compared to Other Ethnic Groups:  
814 Effects on Population-Based Association Studies. *Am. J. Hum. Genet.*  
815 83:445–456.

816 Yoshiura KI, Kinoshita A, Ishida T, Ninokata A, Ishikawa T, Kaname T, Bannai  
817 M, Tokunaga K, Sonoda S, Komaki R, et al. 2006. A SNP in the ABCC11  
818 gene is the determinant of human earwax type. *Nat. Genet.* 38:324–330.

819 Zhang W, Meehan J, Su Z, Ng HW, Shu M, Luo H, Ge W, Perkins R, Tong W,  
820 Hong H. 2014. Whole genome sequencing of 35 individuals provides  
821 insights into the genetic architecture of Korean population. *BMC*  
822 *Bioinformatics* 15:1–13.

823

## 824 **Acknowledgments**

825           We are grateful to the individuals who participated in the study. We  
826 would like to express our deepest gratitude to Mr. Masahiro Inoue, Shota Arichi,  
827 and Akito Tabira who obtained the genotype data and provided the technical  
828 environment for analyzing them. We would like to thank Dr. Hiroki Ota of Tokyo  
829 University, Tokyo, Japan, and Dr. Takashi Gakuhari of Kanazawa University,  
830 Ishikawa, Japan, for providing us the BAM file of the IKawazu Jomon. We also  
831 thank Dr. Naruya Saito from the National Institute of Genetics, Shizuoka, Japan,  
832 and Dr. Hideaki Kanzawa-Kiriyama from the National Museum of Nature and  
833 Science, Tokyo, Japan for providing us the BAM file of the Funadomari Jomon.  
834 This study was partly supported by Grant-in-Aid for Scientific Research (B)  
835 (18H02514) and Grant-in-Aid for Scientific Research on Innovative Areas  
836 (19H05341) from the Ministry of Education, Culture, Sports, Science, and  
837 Technology of Japan. Computations were partially performed on the NIG  
838 supercomputer at ROIS National Institute of Genetics.

839

## 840 **Author contributions**

841           Y.W. and J.O. conceived the study. Y.W. designed and conducted the data  
842 analyses. Y.W. performed the computer simulations. Y.W. wrote the manuscript  
843 with support from J.O. J.O. supervised the project. All authors read and approved  
844 the final manuscript.

845

## 846 **Competing interests**

847            The authors declare no competing interests.

848 **Table 1** Frequencies of the Jomon-derived haplotypes specified by  
 849 phenotypes associated SNPs in *ABCC11*, *EDAR*, *ALDH2*, and *ADH1B*.

|                             |            |         |       |     |
|-----------------------------|------------|---------|-------|-----|
|                             |            |         |       | 850 |
| (a) <i>ABCC11</i>           | rs17822931 |         |       |     |
|                             | Ancestral  | Derived | Total | 851 |
| Jomon-derived haplotype     | 0.106      | 0.240   | 0.346 | 852 |
| Non-Jomon-derived haplotype | 0.014      | 0.639   | 0.653 | 853 |
| Total                       | 0.120      | 0.879   |       | 854 |
|                             |            |         |       | 855 |
| (b) <i>EDAR</i>             | rs3827760  |         |       | 856 |
|                             | Ancestral  | Derived | Total | 857 |
| Jomon-derived haplotype     | 0.149      | 0.173   | 0.322 | 858 |
| Non-Jomon-derived haplotype | 0.048      | 0.630   | 0.678 | 859 |
| Total                       | 0.197      | 0.803   |       | 860 |
|                             |            |         |       | 861 |
| (c) <i>ALDH2</i>            | rs671      |         |       | 862 |
|                             | Ancestral  | Derived | Total | 863 |
| Jomon-derived haplotype     | 0.125      | 0.024   | 0.149 | 864 |
| Non-Jomon-derived haplotype | 0.635      | 0.216   | 0.851 | 865 |
| Total                       | 0.760      | 0.240   |       | 866 |
|                             |            |         |       | 867 |
| (d) <i>ADH1B</i>            | rs1229984  |         |       | 868 |
|                             | Ancestral  | Derived | Total | 869 |
| Jomon-derived haplotype     | 0.038      | 0.048   | 0.086 | 869 |
| Non-Jomon-derived haplotype | 0.231      | 0.683   | 0.914 |     |
| Total                       | 0.269      | 0.731   |       |     |

870 **Figures**

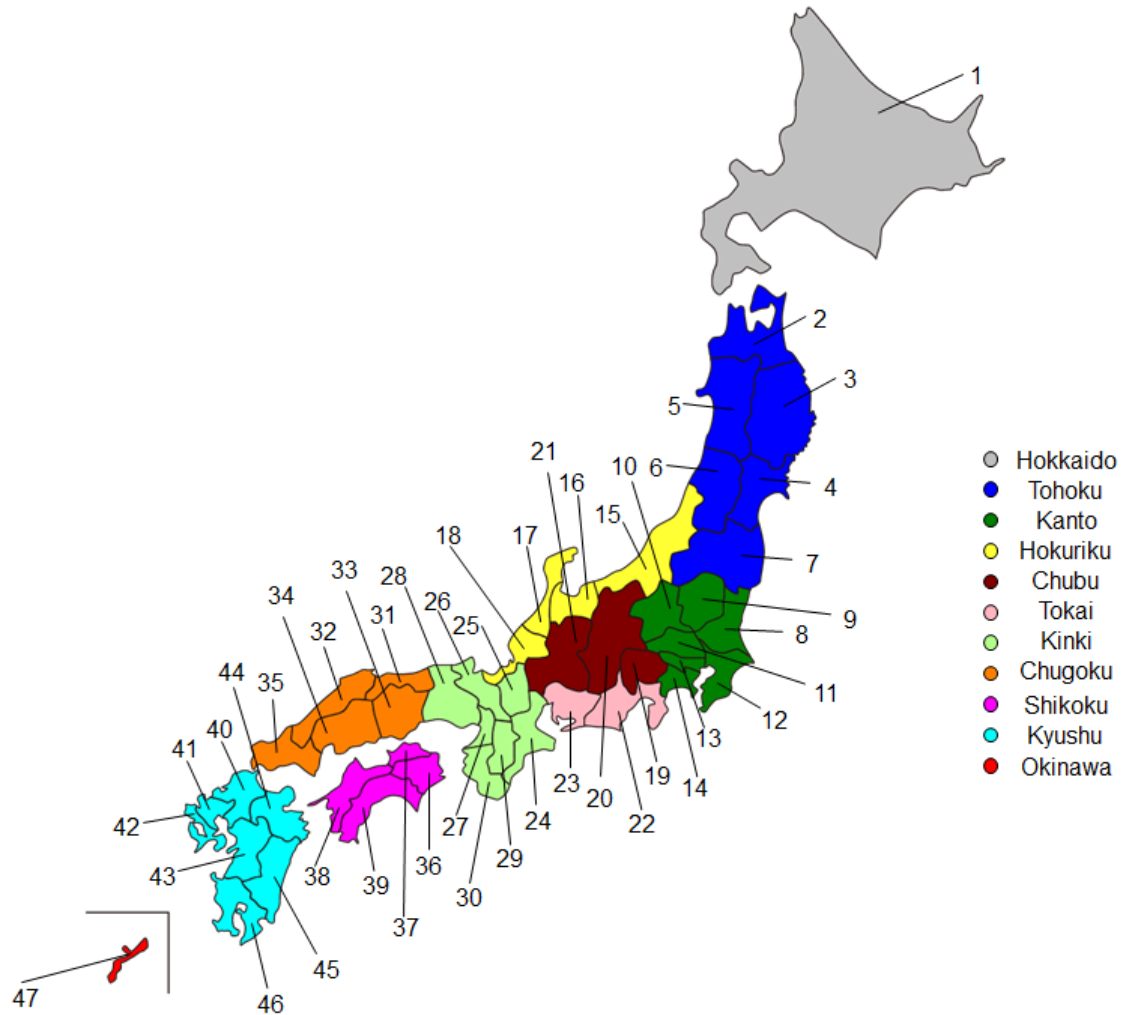

871

872

873 **Fig. 1 Map of the Japanese prefectures.** The prefectures of Japan are divided  
874 into eleven regions. The prefecture numbers in Supplementary Table 1 are  
875 indicated (the corresponding prefecture names are given in Supplementary Table  
876 1). In this study, “mainland Japanese” means the Japanese people except for  
877 individuals from Hokkaido and Okinawa.



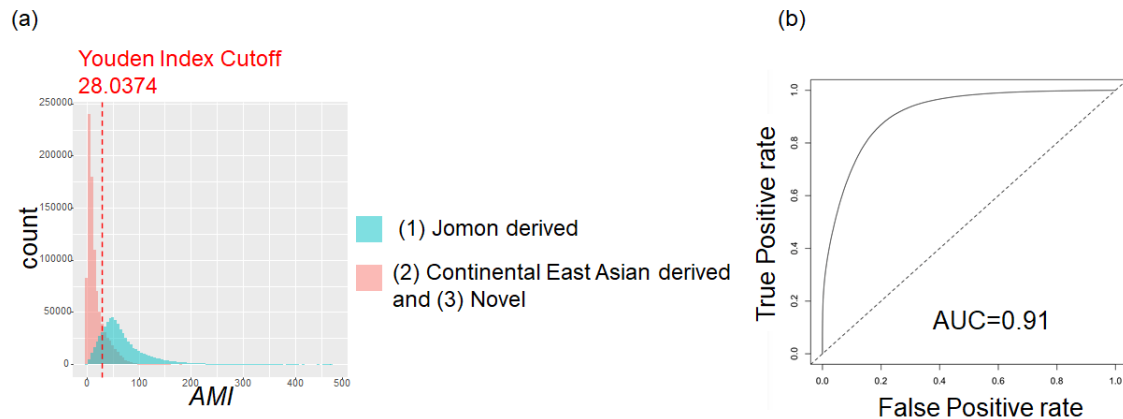

878

879

880 **Fig. 2 (a) Distribution of AMI simulated by msprime.** The histogram of AMI for  
881 the Jomon-derived variants (type 1) and the other variants (types 2 and 3) are  
882 shown. The red dashed line indicates the threshold of AMI (28.0374) obtained  
883 from ROC analysis for the detection of the Jomon-derived variants (type 1). **(b)**  
884 **ROC curve illustrating the performance of the AMI for the detection of the**  
885 **Jomon-derived SNPs.** The ROC curve was drawn based on the simulated data  
886 shown in Fig. 2 (a). The AMI showed high accuracy (AUC = 0.91) for  
887 discriminating the Jomon-derived variants (type 1) from the other variants (types  
888 2 and 3).

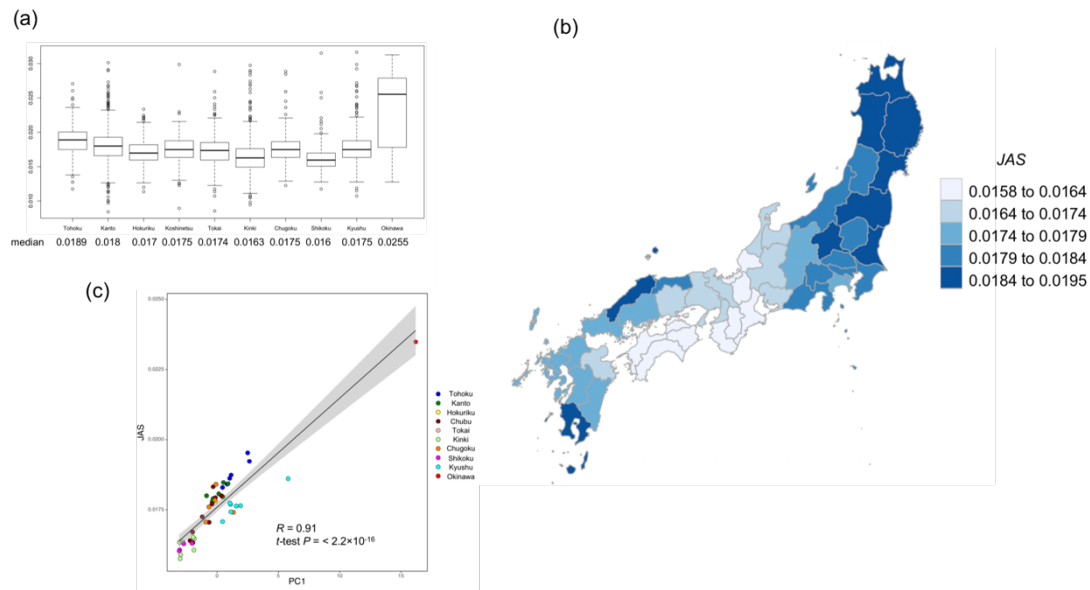

889

890

891 **Fig. 3 (a) Distribution of JAS in ten regions.** The boxplot of the JAS is

892 presented for each of the ten regions, excluding Hokkaido. **(b) JAS of each**

893 **prefecture in Mainland Japan.** The average JAS by prefecture was calculated.

894 Hokkaido and Okinawa prefectures are not illustrated. The prefecture with the

895 higher average JAS is illustrated by the darker color. **(c) Relationship between**

896 **the PC1 of the PCA performed in a previous study by the allele frequency**

897 **of autosomal 183,708 SNPs in each prefecture and average JAS.** Each

898 prefecture was colored according to the region of Japan in Fig. 1. Horizontal axe:

899 PC1, vertical axe: average JAS. Pearson's correlation coefficients ( $R$ ),  $P$  values,

900 regression lines and 95% CI are shown.

901

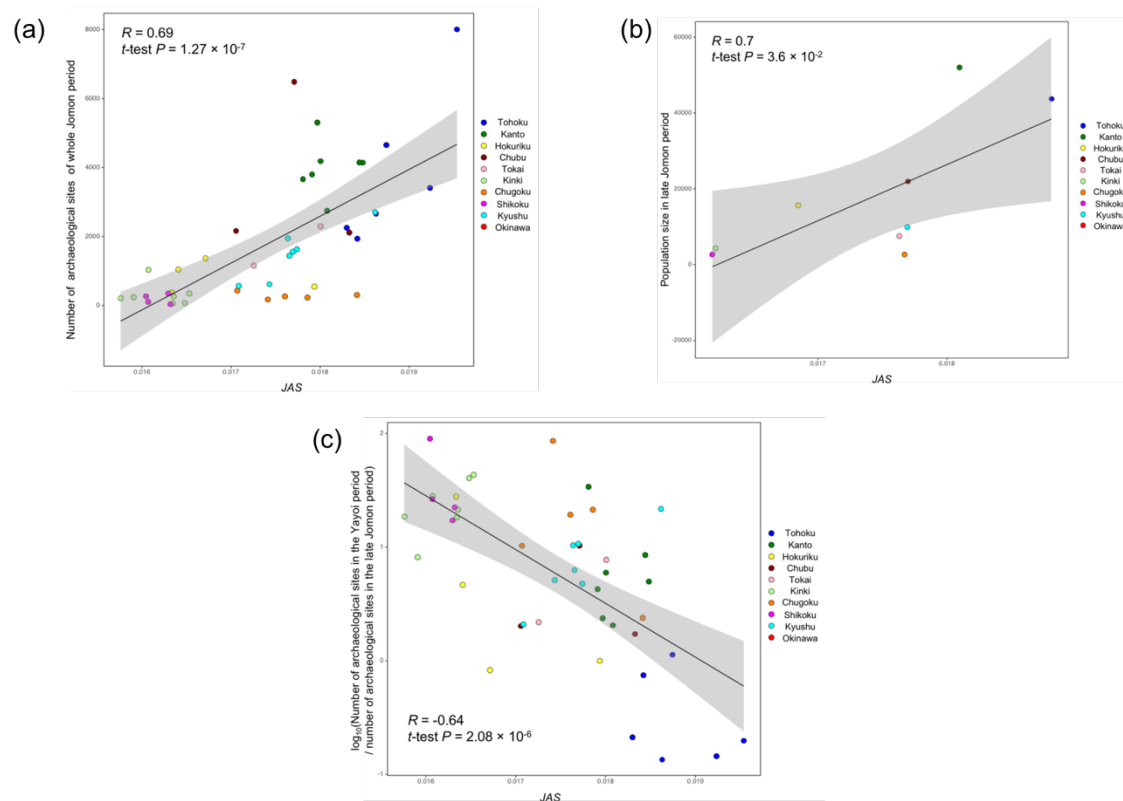

902

903 **Fig. 4 Relationship between the JAS and values associated with the**  
904 **population size of prefectures in the Jomon to Yayoi periods.** The horizontal  
905 axis shows the average JAS and the vertical axis shows the (a) number of  
906 archaeological sites of the whole Jomon period, (b) population size in the Late  
907 Jomon period, and (c)  $\log_{10}$  (number of archaeological sites in the Yayoi  
908 period/number of archaeological sites in the Late Jomon period). Pearson's  
909 correlation coefficients ( $R$ ),  $P$  values, regression lines and 95% CI are shown in  
910 each figure. Each prefecture is colored according to the region in Fig. 1.

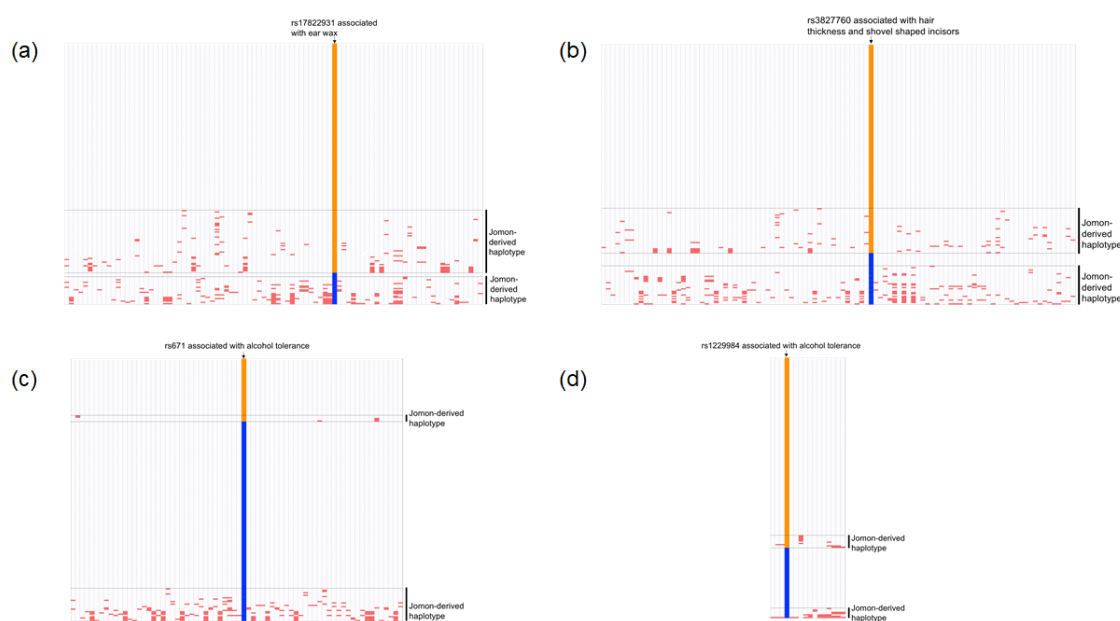

911

912

913 **Fig. 5 Haplotype structures composed of Jomon-derived SNPs in four**

914 **genes associated with the characteristic phenotypes of East Asians. The**

915 haplotype structures surrounding four nonsynonymous SNPs, (a) rs17822931 in

916 *ABCC11* (associated with ear wax type), (b) rs3827760 in *EDAR* (associated

917 with hair thickness and shovel-shaped incisors), (c) rs671 in *ALDH2* (associated

918 with alcohol tolerance), and (d) rs1229984 in *ADH1B* (associated with alcohol

919 tolerance) are illustrated. Each horizontal line represents each haplotype, and

920 each vertical line represents each of the Jomon-derived SNP or phenotype-

921 associated SNP. The derived alleles of the SNPs associated with phenotypes are

922 shown in orange, and the ancestral alleles are shown in blue. The red color

923 represents the Jomon allele, i.e., horizontal lines containing the red colored grid

924 indicate the Jomon-derived haplotypes.

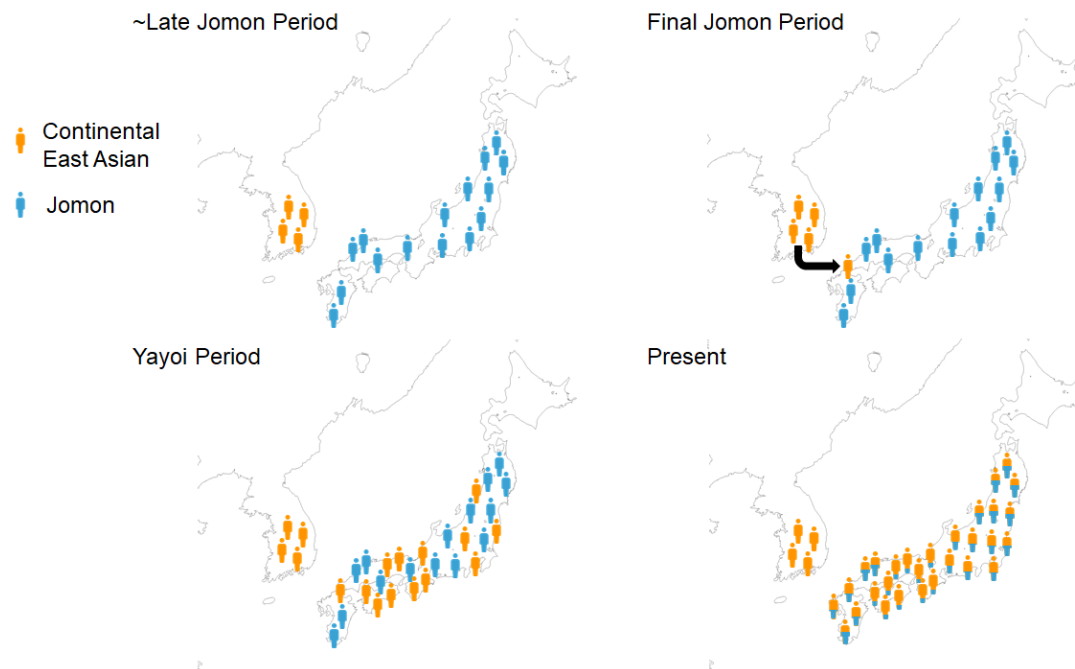

925

926

927 **Fig. 6 The formation process of the Japanese population from the Late**  
928 **Jomon period to the present.** From the Late to the Final Jomon period, the  
929 Jomon people settled down in Mainland Japan, and the population size varied  
930 between regions. In the Final Jomon period, the continental East Asians arrived  
931 in northern Kyushu and then admixed with Jomon people in all the regions of  
932 Mainland Japan. In regions such as Kinki and Shikoku, where the population size  
933 was smaller at the end of the Jomon period, modern Japanese have lower  
934 degrees of genome components derived from the Jomon people.
